# Supplementary material
Source: PubMed Central journal article supplement (PMC5411150)
Supplement: supp_pp.17.00026_PP2017-00026R1_Supplemental_Material.pdf [file supp_pp.17.00026_PP2017-00026R1_Supplemental_Material.pdf]

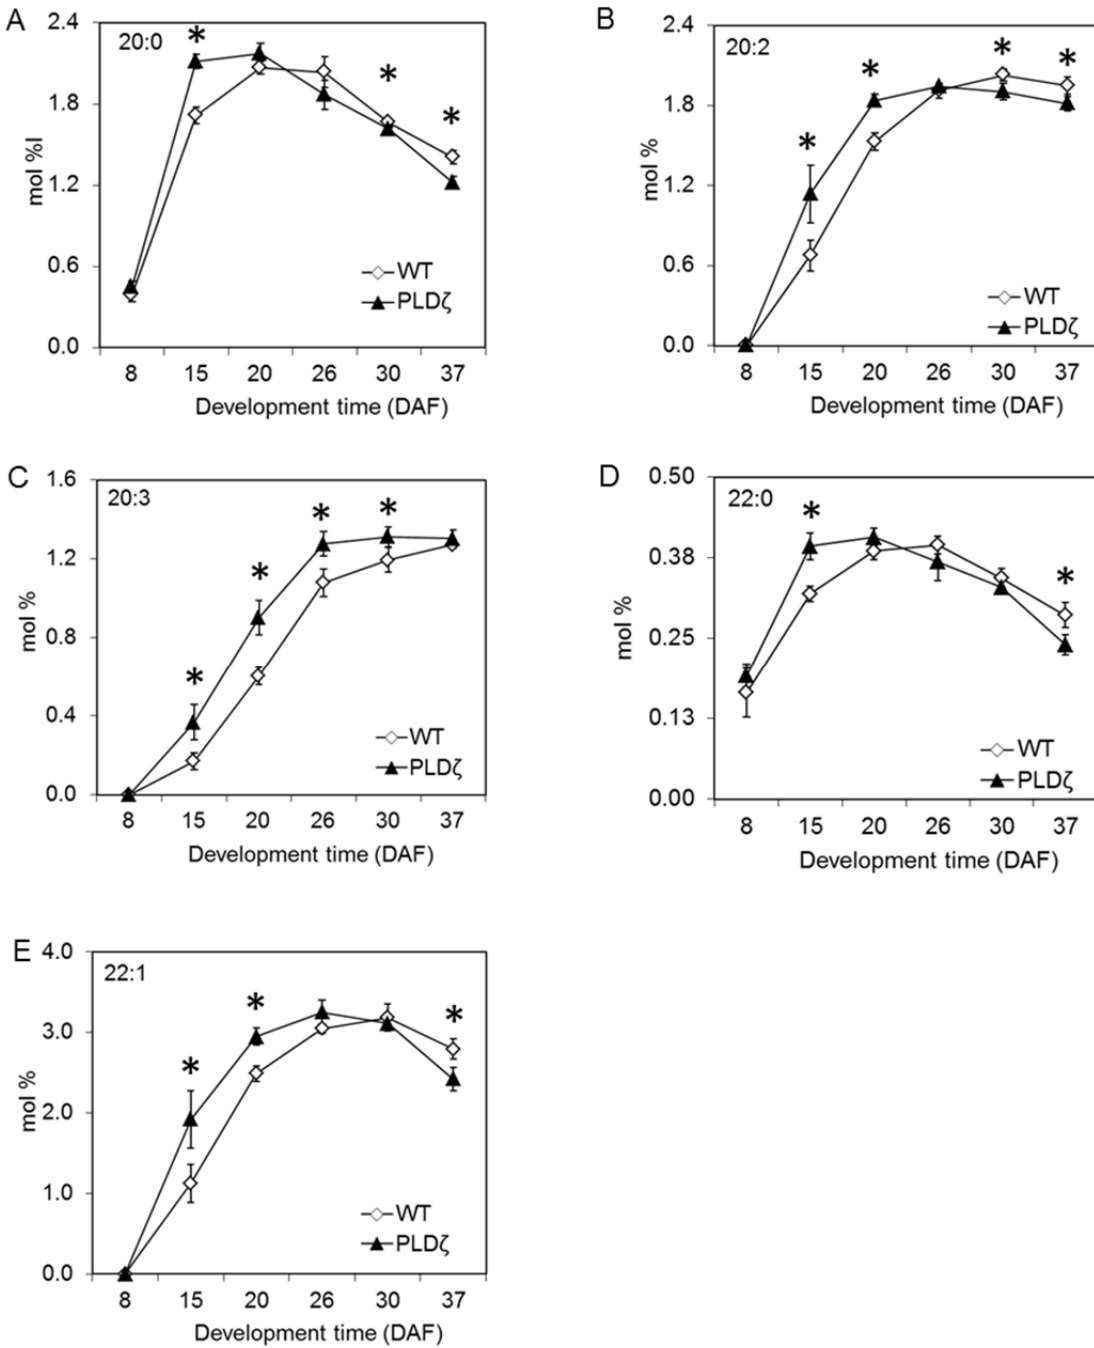

**Fig. S1.** Changes in fatty acid composition of minor fatty acids in seed lipid during seed development of WT and PLD $\zeta$ . (A) Arachidic acid (20:0). (B) Eicosadienoic acid (20:2). (C) Eicosatrienoic acid (20:3). (D) Docosanoic acid (22:0). (E) Erucic acid (22:1) (SD, n=3). Significant differences (T test, P < 0.05) between PLD $\zeta$  and WT are denoted with an asterisk.

1  
2  
3  
4  
5  
6  
7  
8  
9  
10

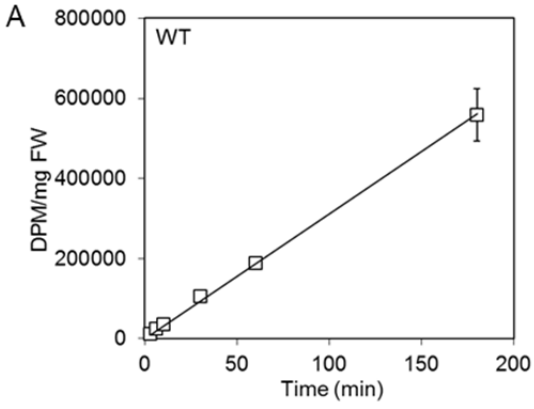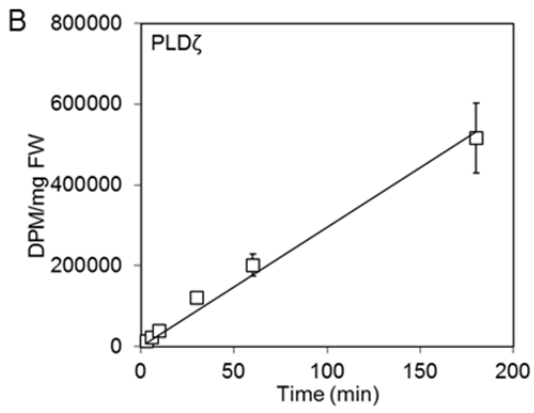

11  
12  
13  
14  
15  
16

**Fig. S2.** Total radioactivity incorporation into fatty acids of seed lipids during [ $^{14}\text{C}$ ]acetate labeling of WT (A) and PLD $\zeta$  (B) developing seeds (SD, n=3, time points: 3, 6, 10, 30, 60, 180 min).

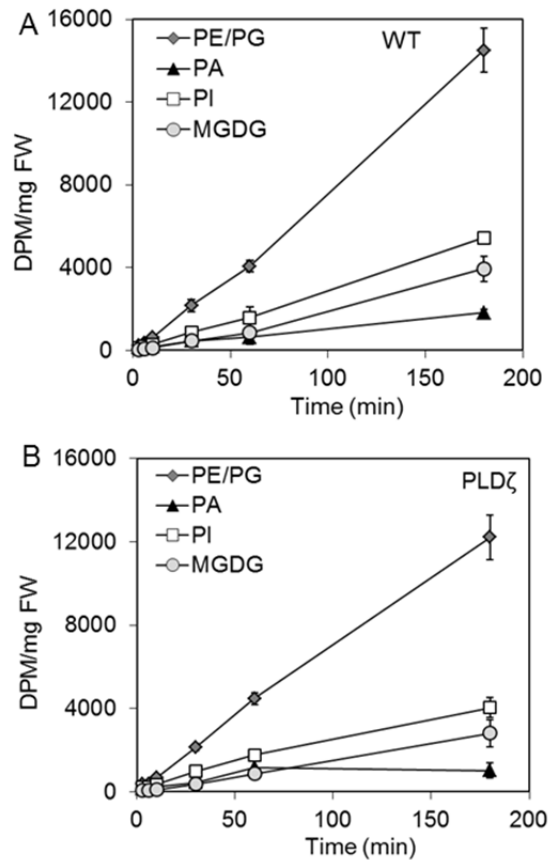

17  
 18 **Fig. S3.** Incorporation of [<sup>14</sup>C]acetate in to fatty acids of PE/PG, PA, PI and MGDG in WT (A) and PLD $\zeta$  (B)  
 19 developing embryos (SD, n=3, time points: 3, 6, 10, 30, 60, 180 min).  
 20  
 21

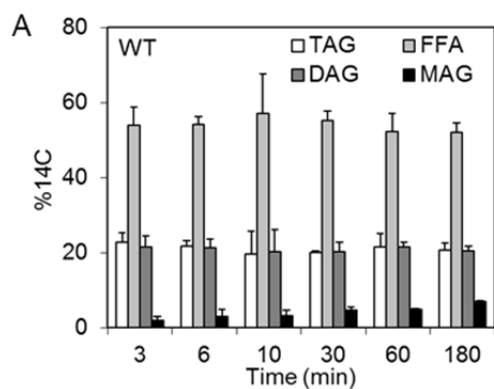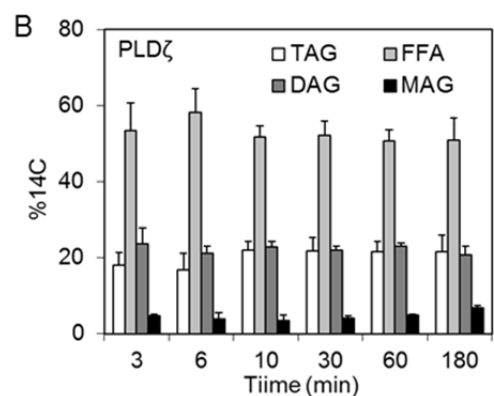

22  
 23 **Fig. S4.** Regiochemistry of [<sup>14</sup>C]acetate labeling in fatty acids incorporated into TAG. Radioactive TAG was  
 24 digested with *Rhizomucor miehei* lipase as described in Materials and Methods. Products of lipase digestion of  
 25 [<sup>14</sup>C]TAG were measured and percentage of each product over total was calculated. (A) WT. (B) PLD<sub>ζ</sub> (SD, n=3,  
 26 time points: 3, 6, 10, 30, 60, 180 min).

27  
 28

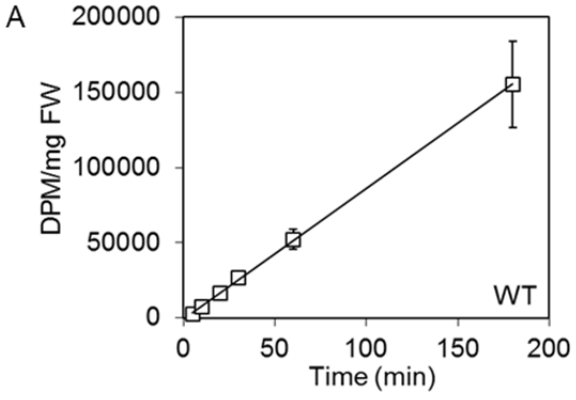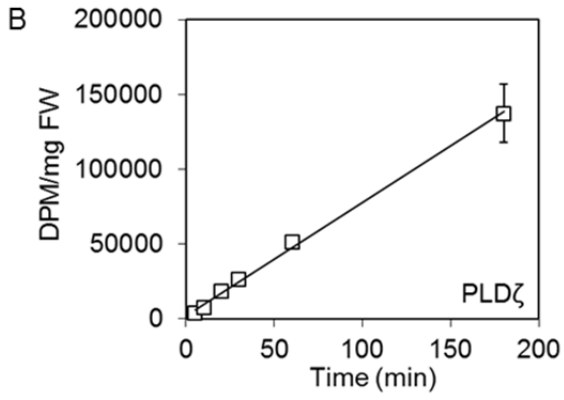

29  
30  
31  
32  
33

**Fig. S5.** Total radioactivity incorporation into fatty acids of seed lipids during [ $^{14}\text{C}$ ]glycerol labeling of WT (A) and PLD $\zeta$  (B) developing seeds (SD, n=3, time points: 5, 10, 20, 30, 60, 180).

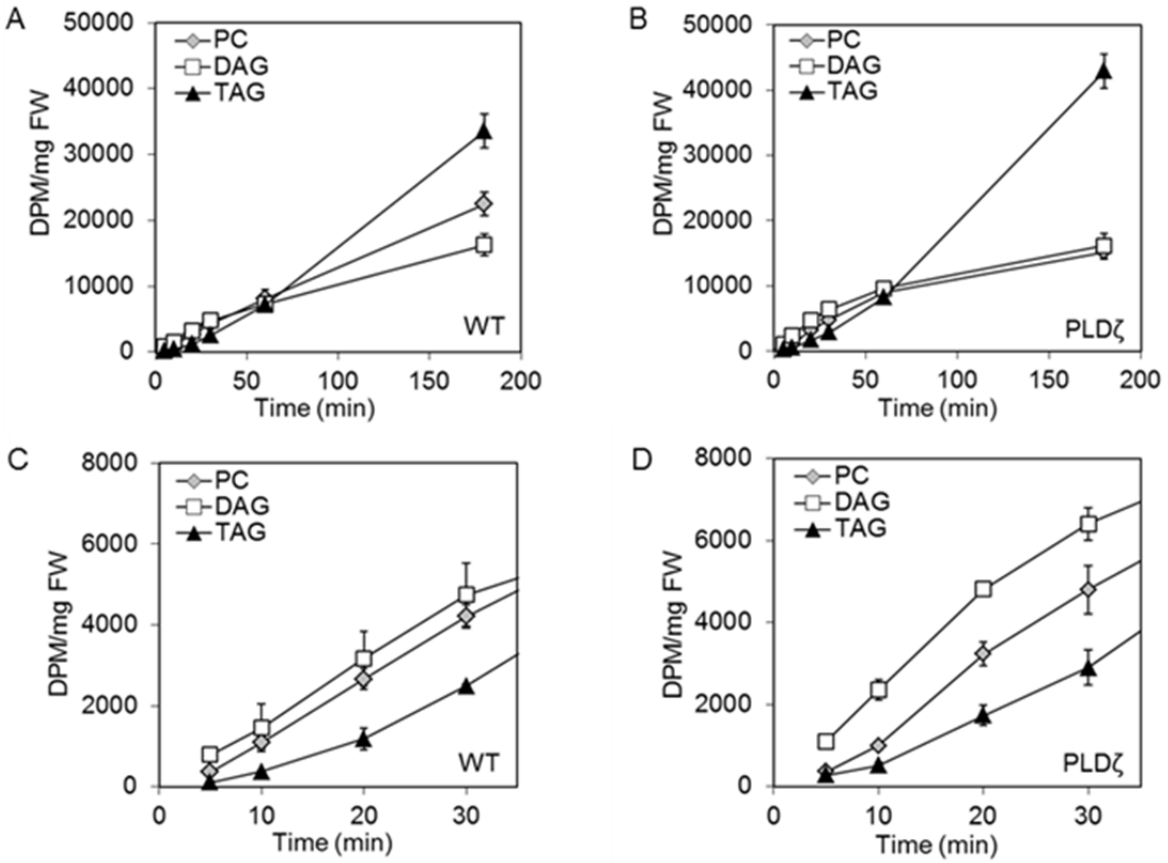

34  
 35 **Fig. S6.** Accumulation of total labeled PC, DAG and TAG in WT (A) and PLD $\zeta$  (B) developing embryos from  
 36 [ $^{14}\text{C}$ ]glycerol labeling (SD, n=3, time points: 5, 10, 20, 30, 60, 180). The early labeling time frame is redrawn in (C,  
 37 D) for WT and PLD $\zeta$  respectively.  
 38  
 39

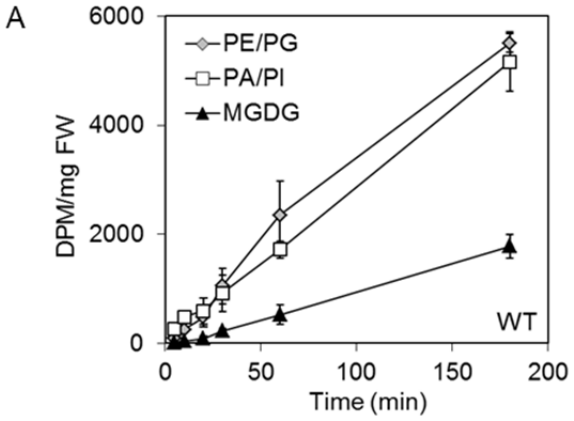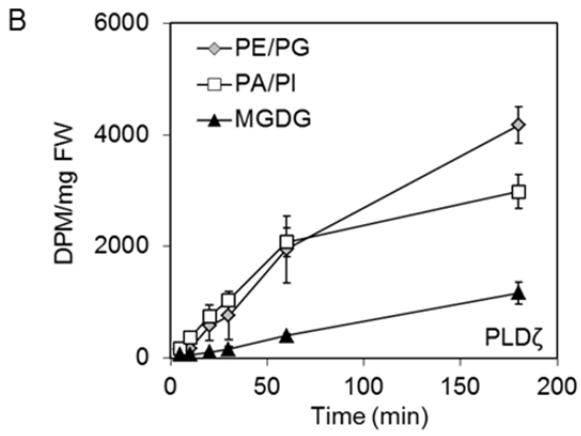

40  
41  
42  
43  
44  
45  
46

**Fig. S7.** Accumulation of labeled PE/PG, PA/PI and MGDG in WT (A) and PLD $\zeta$  (B) developing embryos from [ $^{14}$ C]glycerol labeling (SD, n=3, time points: 5, 10, 20, 30, 60, 180).

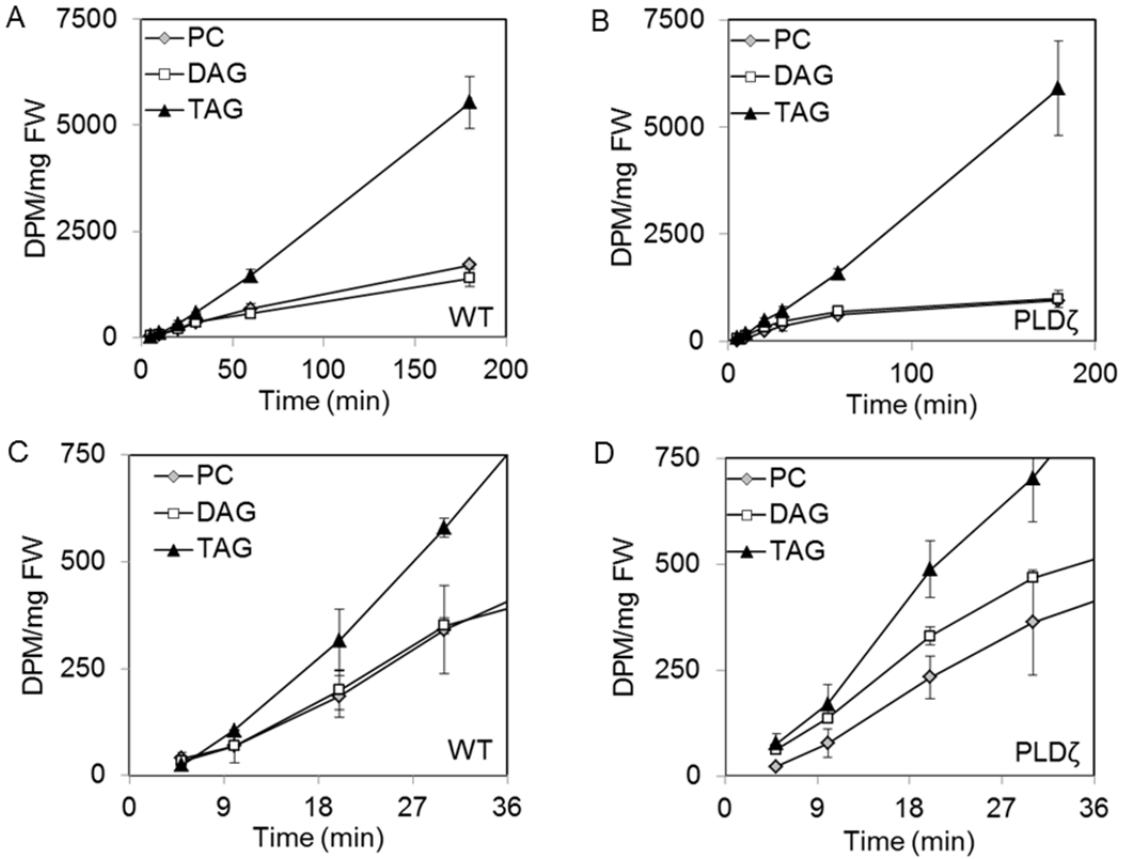

47  
 48  
 49  
 50  
 51  
 52  
 53  
 54

**Fig. S8.** Incorporation of [<sup>14</sup>C]-glycerol into acyl chains of glycerolipids during labeling of WT and PLD<sub>ζ</sub> developing embryos. (A) [<sup>14</sup>C]-glycerol into acyl chains of TAG, DAG and PC in WT embryos. (B) [<sup>14</sup>C]-glycerol into acyl chains of TAG, DAG and PC in PLD<sub>ζ</sub> embryos (SD, n=3, time points: 5, 10, 20, 30, 60, 180). The early labeling time frame is redrawn in (C, D) for WT and PLD<sub>ζ</sub> respectively.



55 **Table S1.** Initial labeling of glycerol backbone. 5 and 10 minute time points from [<sup>14</sup>C]-glycerol incorporation into  
56 the backbone of lipids were linearly regressed to obtain the initial rate of labeling (i.e. slope) and the ratio of slopes,  
57 PC/TAG was calculated to evaluate the relative use of *de novo* DAG for PC and TAG (n=3).  
58

|           | <b>DAG</b>    | <b>PC</b>     | <b>TAG</b>    | <b>PC/TAG</b> |
|-----------|---------------|---------------|---------------|---------------|
| <b>WT</b> | 124.5 ± 64.20 | 141.3 ± 29.45 | 36.50 ± 4.482 | 3.9           |
| <b>OE</b> | 235.6 ± 32.33 | 119.8 ± 35.55 | 28.13 ± 11.89 | 4.3           |

59
